# Supplementary material for: Oligosaccharides elevate the gelatinization temperature of wheat starch more than sucrose, paving the way for their use in reduced sugar starch-based formulations
Source: Royal Society of Chemistry journal article supplement (doi:10.1039/d2fo01779b), 2022-01-01
Supplement: d2fo01779b1.pdf [file d2fo01779b1.pdf]

## Supplementary Tables and Figures

### Tables

**Table S1.** DSC profile settings for determining the dry glass transition temperature of pure and commercial OS samples.

| Sample      | Steps | Profile Settings       |                      |                       |                 |
|-------------|-------|------------------------|----------------------|-----------------------|-----------------|
|             |       | Start Temperature (°C) | End Temperature (°C) | Heating Rate (°C/min) | Hold Time (min) |
| Allulose    | Heat  | 100                    | 120                  | 1                     |                 |
|             | Cool  | 120                    | -20                  | 50                    |                 |
|             | Hold  |                        |                      |                       | 5               |
|             | Heat  | -20                    | 50                   | 10                    |                 |
|             | Cool  | 50                     | -20                  | 50                    |                 |
|             | Hold  |                        |                      |                       | 5               |
| Sucrose     | Heat  | -20                    | 50                   | 10                    |                 |
|             | Heat  | 175                    | 188                  | 1                     |                 |
|             | Cool  | 188                    | -10                  | 50                    |                 |
|             | Hold  | -10                    | -10                  |                       | 5               |
|             | Heat  | -10                    | 80                   | 10                    |                 |
|             | Cool  | 80                     | -10                  | 50                    |                 |
| Melezitose  | Hold  | -10                    | -10                  |                       | 5               |
|             | Heat  | -10                    | 100                  | 10                    |                 |
|             | Heat  | 155                    | 168                  | 1                     |                 |
|             | Cool  | 168                    | 0                    | 50                    |                 |
|             | Hold  | 0                      |                      |                       | 5               |
|             | Heat  | 0                      | 130                  | 10                    |                 |
| Maltotriose | Cool  | 130                    | 0                    | 50                    |                 |
|             | Hold  | 0                      | 0                    |                       | 5               |
|             | Heat  | 0                      | 130                  | 10                    |                 |
|             | Heat  | 100                    | 160                  | 10                    |                 |
|             | Cool  | 160                    | 50                   | 50                    |                 |
|             | Hold  | 50                     |                      |                       | 5               |
| Raffinose   | Heat  | 50                     | 160                  | 10                    |                 |
|             | Heat  | 100                    | 180                  | 10                    |                 |
|             | Hold  | 180                    | 180                  |                       | 5               |
|             | Cool  | 180                    | 20                   | 50                    |                 |
|             | Hold  | 20                     | 20                   |                       | 5               |
|             | Heat  | 20                     | 140                  | 10                    |                 |
| Raffinose   | Cool  | 140                    | 20                   | 50                    |                 |
|             | Hold  | 20                     | 20                   |                       | 5               |
|             | Heat  | 20                     | 140                  | 10                    |                 |
|             | Heat  | 20                     | 140                  | 10                    |                 |

|           |      |     |     |    |   |
|-----------|------|-----|-----|----|---|
| Stachyose | Heat | 100 | 180 | 10 |   |
|           | Hold | 180 | 180 |    | 5 |
|           | Cool | 180 | 50  | 50 |   |
|           | Hold | 50  | 50  |    | 5 |
|           | Heat | 50  | 160 | 10 |   |
|           | Cool | 160 | 50  | 50 |   |
|           | Hold | 50  | 50  |    | 5 |
|           | Heat | 50  | 160 | 10 |   |
| Kestose   | Heat | 160 | 230 | 10 |   |
|           | Hold | 230 | 230 |    | 5 |
|           | Cool | 230 | 50  | 50 |   |
|           | Hold | 50  | 50  |    | 5 |
|           | Heat | 50  | 180 | 10 |   |
|           | Cool | 180 | 70  | 50 |   |
|           | Hold | 50  | 50  |    | 5 |
|           | Heat | 50  | 180 | 10 |   |
| XOS       | Heat | 0   | 120 | 10 |   |
|           | Hold | 120 | 120 |    | 3 |
|           | Cool | 120 | 0   | 50 |   |
|           | Hold | 0   | 0   |    | 5 |
| FOS       | Heat | 0   | 120 | 10 |   |
|           | Heat | 30  | 110 | 20 |   |
|           | Hold | 110 | 110 |    | 3 |
|           | Cool | 110 | 10  | 50 |   |
|           | Hold | 10  | 10  |    | 5 |
|           | Heat | 10  | 90  | 10 |   |
|           | Cool | 90  | 10  | 50 |   |
|           | Hold | 10  | 10  |    | 5 |
| GOS       | Heat | 10  | 90  | 10 |   |
|           | Heat | 80  | 160 | 10 |   |
|           | Hold | 160 | 160 |    | 3 |
|           | Cool | 160 | 80  | 50 |   |
| LOS       | Hold | 80  | 80  |    | 5 |
|           | Heat | 80  | 180 |    |   |
|           | Heat | 180 | 190 | 1  |   |
|           | Hold | 190 | 190 |    | 5 |
|           | Cool | 190 | -10 | 50 |   |
|           | Hold | -10 | -10 |    | 5 |
|           | Heat | -10 | 130 | 10 |   |
|           | Cool | 130 | -10 | 50 |   |
| IMO       | Hold | -10 | -10 |    | 5 |
|           | Heat | -10 | 130 | 10 |   |
|           | Heat | 70  | 130 | 10 |   |
|           | Hold | 130 | 130 |    | 3 |

|          |      |     |     |    |   |
|----------|------|-----|-----|----|---|
|          | Cool | 130 | 70  | 50 |   |
|          | Hold | 70  | 70  |    | 5 |
|          | Heat | 70  | 150 | 10 |   |
| P70R     | Heat | 180 | 220 |    |   |
|          | Hold | 220 | 220 |    | 3 |
|          | Cool | 220 | 120 | 50 |   |
|          | Hold | 120 | 120 |    | 5 |
|          | Heat | 120 | 220 | 10 |   |
|          | Cool | 220 | 120 | 50 |   |
|          | Hold | 120 | 120 |    | 5 |
|          | Heat | 120 | 220 | 10 |   |
| Nutriose | Heat | 100 | 240 | 10 |   |
|          | Hold | 240 | 240 |    | 1 |
|          | Cool | 240 | 160 | 50 |   |
|          | Hold | 160 | 160 |    | 5 |
|          | Heat | 160 | 240 | 10 |   |

---

**Table S2.** The  $T_{gel}$  peak of wheat starch in the presence of pure and commercial OS solutions measured with DSC.

| Pure OS        | Peak $T_{gel}$ (°C)     |                           |                                       |                          |                           |
|----------------|-------------------------|---------------------------|---------------------------------------|--------------------------|---------------------------|
|                | 0%                      | 15%                       | 30%                                   | 45%                      | 60%                       |
| <i>Sucrose</i> | 64.25±0.25 <sup>E</sup> | 69.13±0.24 <sup>Dde</sup> | 76.05±0.19 <sup>Cd</sup>              | 86.57±0.65 <sup>Bc</sup> | 102.13±0.28 <sup>Ad</sup> |
| Allulose       | 64.25±0.25 <sup>E</sup> | 66.10±0.02 <sup>Dg</sup>  | 69.51±0.08 <sup>Cg</sup>              | 75.40±0.08 <sup>B</sup>  | 85.10±0.49 <sup>Ae</sup>  |
| Isomaltulose   | 64.25±0.25 <sup>E</sup> | 69.39±0.15 <sup>Bcd</sup> | 77.15±0.08 <sup>Ac</sup>              |                          |                           |
| Maltose        | 64.25±0.25 <sup>E</sup> | 67.90±0.08 <sup>Cf</sup>  | 74.44±0.27 <sup>Be</sup>              | 84.27±0.58 <sup>Ad</sup> |                           |
| Maltotriose    | 64.25±0.25 <sup>E</sup> | 68.14±0.14 <sup>Df</sup>  | 74.37±0.33 <sup>Ce</sup>              | 83.60±0.48 <sup>Bd</sup> | 101.79±0.22 <sup>Ad</sup> |
| Kestose        | 64.25±0.25 <sup>E</sup> | 70.47±0.15 <sup>Da</sup>  | 79.75±0.24 <sup>Ca</sup>              | 94.01±0.75 <sup>Ba</sup> | 112.18±0.87 <sup>Aa</sup> |
| Melezitose     | 64.25±0.25 <sup>E</sup> | 68.88±0.09 <sup>Ce</sup>  | 72.53±0.07 <sup>Bf</sup>              | 86.70±0.18 <sup>Ac</sup> |                           |
| Lactosucrose   | 64.25±0.25 <sup>E</sup> | 69.96±0.17 <sup>Db</sup>  | 78.04±0.45 <sup>Cb</sup>              | 90.58±0.16 <sup>Bb</sup> | 108.19±0.39 <sup>Ab</sup> |
| Raffinose      | 64.25±0.25 <sup>E</sup> | 70.00±0.10 <sup>Bb</sup>  | 74.38±0.13 <sup>Ae</sup>              |                          |                           |
| Stachyose      | 64.25±0.25 <sup>E</sup> | 69.71±0.10 <sup>Dbc</sup> | 77.77±0.28 <sup>Cb</sup> <sub>c</sub> | 89.84±0.36 <sup>Bb</sup> | 105.13±0.29 <sup>Ac</sup> |

  

| Commercial OS  | Peak $T_{gel}$ (°C)     |                           |                                       |                           |                           |
|----------------|-------------------------|---------------------------|---------------------------------------|---------------------------|---------------------------|
|                | 0%                      | 15%                       | 30%                                   | 45%                       | 60%                       |
| <i>Sucrose</i> | 64.25±0.25 <sup>E</sup> | 69.13±0.24 <sup>Dcd</sup> | 76.05±0.19 <sup>Cd</sup> <sub>e</sub> | 86.57±0.65 <sup>Bd</sup>  | 102.13±0.28 <sup>Ae</sup> |
| FOS            | 64.25±0.25 <sup>E</sup> | 70.86±0.18 <sup>Da</sup>  | 80.81±0.76 <sup>Ca</sup>              | 95.13±0.21 <sup>Ba</sup>  | 114.19±0.25 <sup>Ab</sup> |
| GOS            | 64.25±0.25 <sup>E</sup> | 69.98±0.11 <sup>Db</sup>  | 78.84±0.81 <sup>Cb</sup> <sub>c</sub> | 91.54±1.08 <sup>Bb</sup>  | 107.93±0.42 <sup>Ad</sup> |
| XOS            | 64.25±0.25 <sup>E</sup> | 68.52±0.19 <sup>De</sup>  | 75.00±0.09 <sup>Ce</sup>              | 84.86±0.43 <sup>Bd</sup>  | 99.45±0.21 <sup>Af</sup>  |
| IMO            | 64.25±0.25 <sup>E</sup> | 69.23±0.05 <sup>Dc</sup>  | 77.51±0.25 <sup>Cc</sup> <sub>d</sub> | 89.48±0.21 <sup>Bc</sup>  | 102.89±0.47 <sup>Ae</sup> |
| Promitor 70R   | 64.25±0.25 <sup>E</sup> | 68.68±0.10 <sup>Dde</sup> | 77.82±0.44 <sup>Cc</sup>              | 91.12±0.86 <sup>Bbc</sup> | 109.85±0.38 <sup>Ac</sup> |
| Nutriose       | 64.25±0.25 <sup>E</sup> | 68.69±0.25 <sup>Dde</sup> | 80.36±0.79 <sup>Ca</sup> <sub>b</sub> | 95.61±0.25 <sup>Ba</sup>  | 116.55±1.08 <sup>Aa</sup> |

Uppercase letters indicate statistical differences between solution concentration for a given sample, and lowercase letters indicate statistical differences between samples within a concentration.

**Table S3.** The  $\Delta H$  of wheat starch gelatinization in the presence of pure and commercial OS solutions measured with DSC.

| Pure OS        | $\Delta H$ (J/g)        |                           |                          |                          |                          |
|----------------|-------------------------|---------------------------|--------------------------|--------------------------|--------------------------|
|                | 0%                      | 15%                       | 30%                      | 45%                      | 60%                      |
| <i>Sucrose</i> | 3.04±0.25 <sup>A</sup>  | 3.59±0.12 <sup>Aa</sup>   | 2.96±0.67 <sup>Ab</sup>  | 3.54±0.16 <sup>Aa</sup>  | 3.56±0.79 <sup>Aa</sup>  |
| Allulose       | 3.04±0.25 <sup>A</sup>  | 2.83±0.04 <sup>Aab</sup>  | 2.76±0.14 <sup>Ab</sup>  | 2.65±0.06 <sup>Aa</sup>  | 3.07±0.33 <sup>Aa</sup>  |
| Isomaltulose   | 3.04±0.25 <sup>A</sup>  | 3.16±0.31 <sup>Aab</sup>  | 3.56±0.54 <sup>Aab</sup> |                          |                          |
| Maltose        | 3.04±0.25 <sup>A</sup>  | 3.26±0.42 <sup>Aab</sup>  | 3.31±0.38 <sup>Aab</sup> | 3.46±0.18 <sup>Aa</sup>  |                          |
| Maltotriose    | 3.04±0.25 <sup>A</sup>  | 2.58±0.38 <sup>Ab</sup>   | 3.26±0.76 <sup>Aab</sup> | 3.49±0.57 <sup>Aa</sup>  | 4.33±1.21 <sup>Aa</sup>  |
| Kestose        | 3.04±0.25 <sup>B</sup>  | 3.07±0.03 <sup>ABab</sup> | 4.38±0.11 <sup>Aa</sup>  | 3.87±1.02 <sup>ABa</sup> | 3.11±0.52 <sup>ABa</sup> |
| Melezitose     | 3.04±0.25 <sup>A</sup>  | 2.91±0.37 <sup>Aab</sup>  | 3.48±0.35 <sup>Aab</sup> | 3.57±0.50 <sup>Aa</sup>  |                          |
| Lactosucrose   | 3.04±0.25 <sup>A</sup>  | 3.36±0.56 <sup>Aab</sup>  | 3.70±0.64 <sup>Aab</sup> | 3.56±0.99 <sup>Aa</sup>  | 3.22±0.73 <sup>Aa</sup>  |
| Raffinose      | 3.04±0.25 <sup>A</sup>  | 2.98±0.10 <sup>Aab</sup>  | 2.35±0.12 <sup>Ab</sup>  |                          |                          |
| Stachyose      | 3.04±0.25 <sup>A</sup>  | 2.96±0.13 <sup>Aab</sup>  | 2.77±0.32 <sup>Ab</sup>  | 3.04±0.50 <sup>Aa</sup>  | 3.12±0.55 <sup>Aa</sup>  |
| Commercial OS  | $\Delta H$ (J/g)        |                           |                          |                          |                          |
|                | 0%                      | 15%                       | 30%                      | 45%                      | 60%*                     |
| <i>Sucrose</i> | 3.04±0.25 <sup>A</sup>  | 3.59±0.12 <sup>Aa</sup>   | 2.96±0.67 <sup>Aa</sup>  | 3.54±0.16 <sup>Aa</sup>  | 3.56±0.79 <sup>Aa</sup>  |
| FOS            | 3.04±0.25 <sup>A</sup>  | 3.00±0.56 <sup>Aab</sup>  | 2.69±0.75 <sup>Aa</sup>  | 3.53±0.14 <sup>Aa</sup>  | 3.14±0.05 <sup>Aa</sup>  |
| GOS            | 3.04±0.25 <sup>A</sup>  | 3.15±0.66 <sup>Aa</sup>   | 3.78±0.61 <sup>Aa</sup>  | 3.80±0.63 <sup>Aa</sup>  | 3.87±0.37 <sup>Aa</sup>  |
| XOS            | 3.04±0.25 <sup>A</sup>  | 3.09±0.34 <sup>Aab</sup>  | 3.44±0.17 <sup>Aa</sup>  | 3.12±0.45 <sup>Aa</sup>  | 2.88±0.50 <sup>Aa</sup>  |
| IMO            | 3.04±0.25 <sup>AB</sup> | 3.27±0.26 <sup>Ba</sup>   | 3.54±0.18 <sup>ABa</sup> | 4.43±0.49 <sup>Aa</sup>  | 3.51±0.45 <sup>Aa</sup>  |
| Promitor 70R   | 3.04±0.25 <sup>A</sup>  | 2.80±0.27 <sup>Aab</sup>  | 3.57±0.72 <sup>Aa</sup>  | 3.18±0.99 <sup>Aa</sup>  | 2.38±0.96 <sup>Aa</sup>  |
| Nutriose       | 3.04±0.25 <sup>AB</sup> | 2.04±0.30 <sup>Bb</sup>   | 3.36±0.70 <sup>ABa</sup> | 3.49±0.55 <sup>Aa</sup>  |                          |

Uppercase letters indicate statistical differences between solution concentration for a given sample, and lowercase letters indicate statistical differences between samples within a concentration.

\*The  $\Delta H$  of 60% Nutriose-wheat starch slurry was not obtained due to overlapping of the  $\Delta H$  from water vaporization.

**Table S4.** The solvent effective volume fraction ( $\phi_{w,eff}$ ) of pure and commercial OS solutions examined in this study.

| Sweetener    | Conc. (%w/w) | Molar Concentration | $\phi_{w,eff}$ |
|--------------|--------------|---------------------|----------------|
| Sucrose      | 15           | 0.4643              | 0.7507         |
|              | 30           | 1.0050              | 0.6608         |
|              | 45           | 1.5728              | 0.5731         |
|              | 60           | 2.2509              | 0.4681         |
| FOS          | 15           | 0.1856              | 0.7416         |
|              | 30           | 0.3931              | 0.6471         |
|              | 45           | 0.6165              | 0.5491         |
|              | 60           | 0.8845              | 0.4317         |
| GOS          | 15           | 0.2497              | 0.7522         |
|              | 30           | 0.5316              | 0.6678         |
|              | 45           | 0.8502              | 0.5749         |
|              | 60           | 1.1851              | 0.4817         |
| IMO          | 15           | 0.4401              | 0.7586         |
|              | 30           | 0.9373              | 0.6823         |
|              | 45           | 1.4581              | 0.6073         |
|              | 60           | 2.1017              | 0.5124         |
| Promitor 70R | 15           | 0.0658              | 0.7391         |
|              | 30           | 0.1371              | 0.6494         |
|              | 45           | 0.2155              | 0.5519         |
|              | 60           | 0.3098              | 0.4348         |
| XOS          | 15           | 0.3598              | 0.7498         |
|              | 30           | 0.7567              | 0.6659         |
|              | 45           | 1.2108              | 0.5707         |
|              | 60           | 1.7276              | 0.4652         |
| Water        | 0            | 0.0000              | 0.7561         |
| Allulose     | 15           | 0.8822              | 0.7608         |
|              | 30           | 1.9094              | 0.6824         |
|              | 45           | 2.9883              | 0.6067         |
|              | 60           | 4.2767              | 0.5155         |
| Maltose      | 15           | 0.4654              | 0.7501         |
|              | 30           | 0.9895              | 0.6648         |
| Isomaltulose | 15           | 0.4646              | 0.7517         |
|              | 30           | 0.9927              | 0.6665         |
| Kestose      | 15           | 0.3151              | 0.7430         |
|              | 30           | 0.6727              | 0.6483         |
|              | 45           | 1.0729              | 0.5457         |

|              |    |        |        |
|--------------|----|--------|--------|
|              | 60 | 1.5332 | 0.4305 |
| Raffinose    | 15 | 0.3148 | 0.7485 |
|              | 30 | 0.6692 | 0.6609 |
| Lactosucrose | 15 | 0.3170 | 0.7504 |
|              | 30 | 0.6720 | 0.6668 |
|              | 45 | 1.0735 | 0.5743 |
|              | 60 | 1.5146 | 0.4760 |
| Maltotriose  | 15 | 0.3198 | 0.7491 |
|              | 30 | 0.6721 | 0.6678 |
|              | 45 | 1.0711 | 0.5768 |
|              | 60 | 1.4775 | 0.4886 |
| Melezitose   | 15 | 0.3160 | 0.7494 |
|              | 30 | 0.6546 | 0.6704 |
|              | 45 | 1.0420 | 0.5789 |
| Stachyose    | 15 | 0.2393 | 0.7429 |
|              | 30 | 0.5092 | 0.6499 |
|              | 45 | 0.8136 | 0.5478 |
|              | 60 | 1.1327 | 0.4452 |

---

## Supplementary Figures

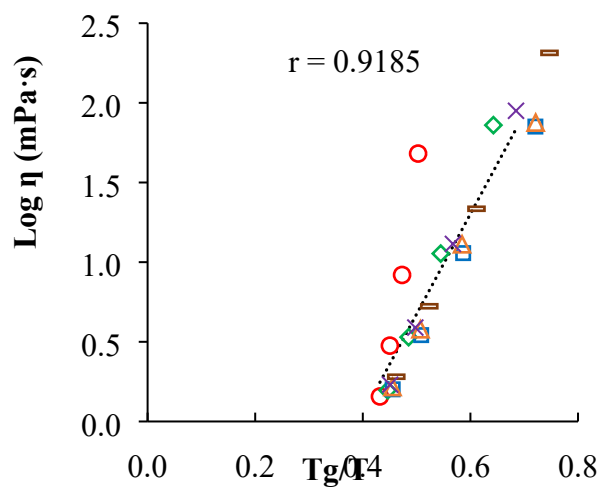

**Figure S1.** The solution viscosity ( $\eta$ ) of sucrose (red circles) and OS solutions [FOS (green diamonds), GOS (blue squares), IMO (orange triangle), P70R (brown dash), and XOS (purple 'X's)] compared to  $T_g/T$ ; where  $T_g$  was the calculated  $T_g$  of the OS in solution based on the Couchman-Karasz model from van der Sman and Mauer (2019)<sup>39</sup>, and  $T$  was the onset  $T_{\text{gel}}$  measured in Table 5.
